# Supplementary material for: Comparison of the Seventh and Eighth Edition of American Joint Committee on Cancer (AJCC) Staging for Selected and Nonselected Oropharyngeal Squamous Cell Carcinomas
Source: PubMed Central journal article supplement (PMC8842371; doi:10.1093/oncolo/oyab001), 2022-01-28
Supplement: oyab001_suppl_supplementary_tables.pdf [file oyab001_suppl_supplementary_tables.pdf]

Supplemental Tables for:

Comparison of the 7th & 8th ed of American Joint Committee on Cancer (AJCC) staging for selected & non-selected oropharyngeal squamous cell carcinomas

Nabil Saba et al.

Table S1: AJCC 8 Staging Categories for non HPV-associated OPSCC adapted from updated AJCC 8 guidelines

**Table S1: AJCC 8 Stage Categories for non HPV-Associated OPSCC**

| Stage Group | T Category      | N Category | M Category |
|-------------|-----------------|------------|------------|
| 0           | Tis             | N0         | M0         |
| I           | T1              | N0         | M0         |
| II          | T2              | N0         | M0         |
| III         | T3              | N0         | M0         |
| III         | T1, T2, T3      | N1         | M0         |
| IVA         | T4a             | N0, N1     | M0         |
| IVA         | T1, T2, T3, T4a | N2         | M0         |
| IVB         | Any T           | N3         | M0         |
| IVB         | T4b             | Any N      | M0         |
| IVC         | Any T           | Any N      | M1         |

Table S2: AJCC 8 Staging Categories for non HPV-associated OPSCC  
adapted from updated AJCC 8 guidelines

**Table S2: AJCC 8 Stage Categories for HPV-Associated OPSCC**

| <b>Stage Group</b> | <b>T Category</b>     | <b>N Category</b> | <b>M Category</b> |
|--------------------|-----------------------|-------------------|-------------------|
| I                  | T0, T1, or T2         | N0 or N1          | M0                |
| II                 | T0, T1, or T2         | N2                | M0                |
| II                 | T3                    | N0, N1, or N2     | M0                |
| III                | T0, T1, T2, T3, or T4 | N3                | M0                |
| III                | T4                    | N0, N1, N2, or N3 | M0                |
| IV                 | Any T                 | Any N             | M1                |

Table S3 – 7<sup>th</sup> edition AJCC Staging Group after restaging with Supplemental Table 1

| 7 <sup>th</sup> Stage Group | T Category          | N Category               | M Category | Frequency | Percent |
|-----------------------------|---------------------|--------------------------|------------|-----------|---------|
| I                           | <b>T0/T1</b>        | <b>N0</b>                | <b>M0</b>  | 188       | 1.97    |
|                             | <b>T0</b>           | <b>N1</b>                | <b>M0</b>  |           |         |
| II                          | <b>T2</b>           | <b>N0</b>                | <b>M0</b>  | 560       | 5.86    |
|                             | <b>T0</b>           | <b>N2a/N2b/N2c/N2NOS</b> | <b>M0</b>  |           |         |
| III                         | <b>T3</b>           | <b>N0</b>                | <b>M0</b>  | 1784      | 18.67   |
|                             | <b>T1/T2/T3</b>     | <b>N1</b>                | <b>M0</b>  |           |         |
|                             | <b>T0</b>           | <b>N3</b>                | <b>M0</b>  |           |         |
| IVA                         | <b>T4a</b>          | <b>N0/N1</b>             | <b>M0</b>  | 6049      | 63.31   |
|                             | <b>T1/T2/T3/T4a</b> | <b>N2a/N2b/N2c/N2NOS</b> | <b>M0</b>  |           |         |
| IVB                         | *                   | <b>N3</b>                | <b>M0</b>  | 581       | 6.08    |
|                             | *                   | <b>T4b</b>               | <b>M0</b>  |           |         |
| IVC                         | *                   | *                        | <b>M1</b>  | 392       | 4.10    |

Table S4 - 8th edition AJCC Staging Group after restaging with Supplemental Table 2

| <b>8<sup>th</sup><br/>Stage<br/>Group</b> | <b>T Category</b>                     | <b>N Category</b>                           | <b>M<br/>Category</b> | <b>Frequenc<br/>y</b> | <b>Perce<br/>nt</b> |
|-------------------------------------------|---------------------------------------|---------------------------------------------|-----------------------|-----------------------|---------------------|
| <b>I</b>                                  | <b>T0/T1/T2</b>                       | <b>N0/N1</b>                                | <b>M0</b>             | 1836                  | 19.22               |
| <b>II</b>                                 | <b>T1/T1/T2</b>                       | <b>N2a/N2b/N2c/N2NOS</b>                    | <b>M0</b>             | 5326                  | 55.75               |
|                                           | <b>T3</b>                             | <b>N0/N1/<br/>N2a/N2b/N2c/N2NOS</b>         | <b>M0</b>             |                       |                     |
| <b>III</b>                                | <b>T0/T1/T2/T3/T4a/T4b/T4NO<br/>S</b> | <b>N3</b>                                   | <b>M0</b>             | 2000                  | 20.93               |
|                                           | <b>T4a/T4b/T4NOS</b>                  | <b>N0/N1/<br/>N2a/N2b/N2c/N2NOS/N<br/>3</b> | <b>M0</b>             |                       |                     |
| <b>IV</b>                                 | <b>*</b>                              | <b>*</b>                                    | <b>M1</b>             | 392                   | 4.10                |
